# Supplementary material for: NHS-ester conjugated gold nanoparticles for spermine detection: a potential tool in meat spoilage monitoring
Source: Royal Society of Chemistry journal article supplement (doi:10.1039/d4sd00320a), 2025-01-01

## SUPPLEMENTARY INFORMATION

### **NHS-Ester Conjugated Gold Nanoparticles for Spermine Detection: A Potential Tool in Meat Spoilage Monitoring**

Teody Gumabat<sup>a,\*</sup>, Jeanne Phyre Lagare Oracion<sup>a</sup>, Jolina Fedelis<sup>a</sup>, Ethel Keleste<sup>a</sup>, Rey Capangpangan<sup>b</sup>, Noel Lito Sayson<sup>c,d</sup>, Gerard Dumancas<sup>e</sup>, Arnold Alguno<sup>c,d</sup>, and Felmer Latayada<sup>a,f,\*</sup>

<sup>a</sup> Center for Nanoscience and Technology for Research and Entrepreneurship (CeNTRE), Material Science and Polymer Chemistry (MSPC) Laboratory, Caraga State University, 8600 Butuan City, Philippines

<sup>b</sup> Department of Physical Sciences and Mathematics, College of Marine and Allied Sciences, Mindanao State University at Naawan, Naawan 9023, Misamis Oriental, Philippines;

<sup>c</sup> Department of Physics, Mindanao State University-Iligan Institute of Technology, Iligan City 9200, Philippines

<sup>d</sup> Research Center for Energy Efficient Materials (RCEEM), Premier Research Institute of Science and Mathematics (PRISM), MSU-Iligan Institute of Technology, Iligan City 9200, Philippines

<sup>e</sup> Department of Chemistry, Loyola Science Center, The University of Scranton, Scranton, Pennsylvania 18510, United States

<sup>f</sup> Department of Chemistry, Caraga State University, Butuan City 8600, Philippines

\*[tlgumabat@carsu.edu.ph](mailto:tlgumabat@carsu.edu.ph), [fslatayada@carsu.edu.ph](mailto:fslatayada@carsu.edu.ph)

**S1.** TEM image of the bare gold nanoparticles (Bare-AuNP) used in the study

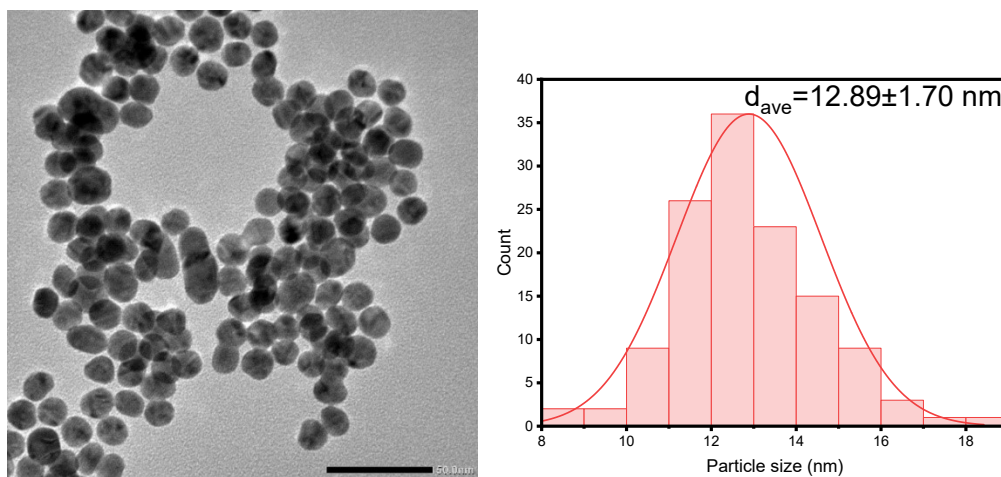

**S2.** TEM image of the bare gold nanoparticles (Bare-AuNP) in the presence of 9.5  $\mu$ M histamine.

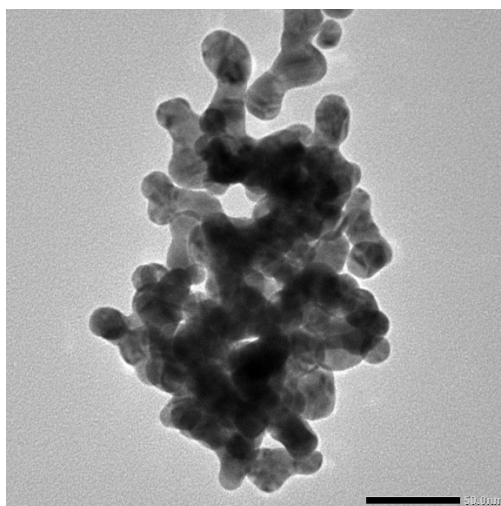

Supplement: d4sd00320a1.pdf [file d4sd00320a1.pdf]
